# Supplementary material for: Linking migraine frequency with family history of migraine
Source: PubMed Central journal article supplement — Cephalalgia. 2018 Jun 17;39(2):229–36. doi: 10.1177/0333102418783295 (PMC6376592; doi:10.1177/0333102418783295), 2018-06-17
Supplement: Supplemental_material.pdf [file Supplemental_material.pdf]

## **Supplemental material**

### **Participants and procedures**

Our study was conducted as a part of the LUMINA project.(1) Participants of the LUMINA project were Dutch adults aged 18 to 74 years with migraine with or without aura according to the International Classification of Headache Disorders criteria (previously ICHD-II, now ICHD-III beta version).(2, 3) Our LUMINA study population was invited via the lay press nationwide to enroll via the especially designed, nation-wide LUMINA website. Additionally, patients from our outpatient headache clinic were invited by a letter. This group however, comprises only 3.5% of the total LUMINA population. On the website, patients were asked to fill out a screening questionnaire.(1) Firstly, if patients fulfilled the screening criteria, they were sent a web-based extended migraine questionnaire, based on the ICHD-II criteria (now ICHD-III beta).(2, 3) This questionnaire was validated previously by performing a semi-structured telephone interview in 1038 patients who had filled out the extended migraine questionnaire.(1) The specificity of the questionnaire was 0.95. In addition to questions that were necessary to diagnose migraine accurately, the extended questionnaire also included items on demographic factors, acute and prophylactic headache medication use, migraine attack frequency and migraine days, and allodynia (the experience of pain due to stimuli that do normally not provoke pain). Participants without the needed internet skills were able to fill out the questionnaires on paper. The LUMINA project was approved by the medical ethics committee of the Leiden University Medical Centre. All subjects provided written informed consent prior to the study.

### **Supplementary references**

1. van Oosterhout WP, Weller CM, Stam AH, et al. Validation of the web-based LUMINA questionnaire for recruiting large cohorts of migraineurs. *Cephalalgia* 2011 Oct;31:1359-1367.
2. The International Classification of Headache Disorders: 2nd edition. *Cephalalgia* 2004;24 Suppl 1:9-160.
3. The International Classification of Headache Disorders, 3rd edition (beta version). *Cephalalgia* 2013 Jul;33:629-808.
